# Supplementary material
Source: Springer Nature journal article supplement (https://www.springermedizin.de/resource/supplementary/12899_2013_211_MOESM5_ESM.pdf/9514720)

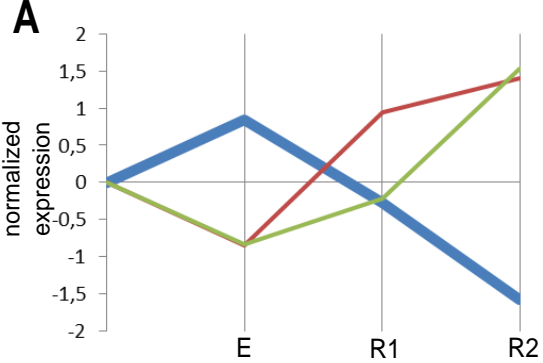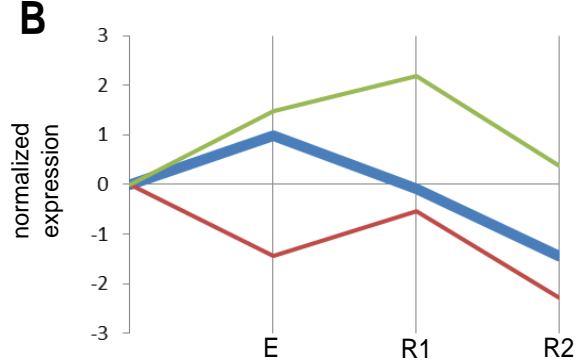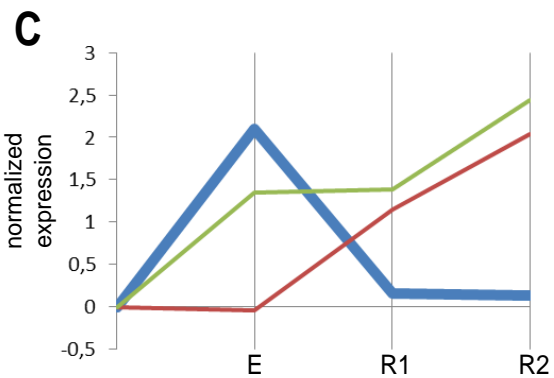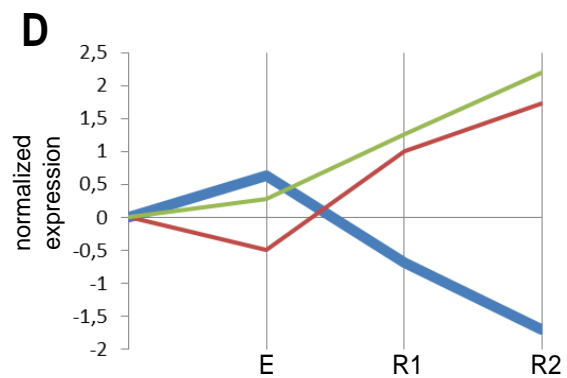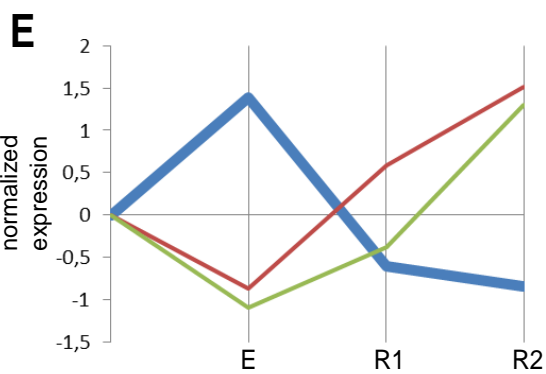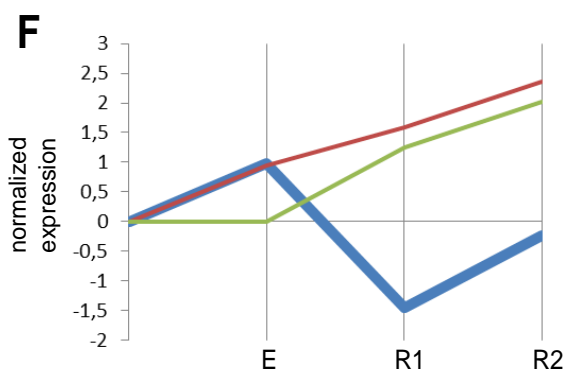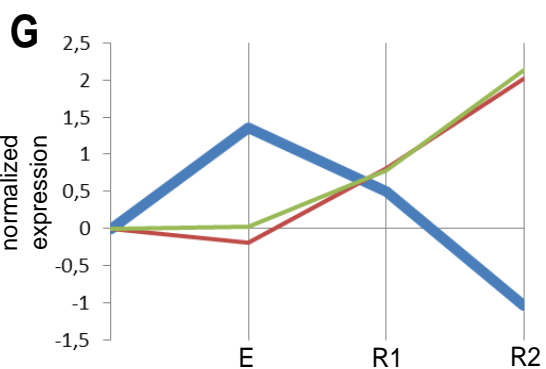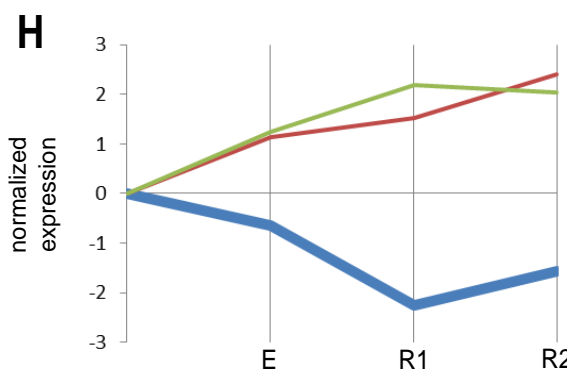

Supplement: MOESM5 [file 9514720]
